# Supplementary material
Source: HighWire-hosted journal article supplement (http://thorax.bmj.com/highwire/filestream/206993/field_highwire_adjunct_files/5/thorax-2023-220012supp006_data_supplement.pdf)

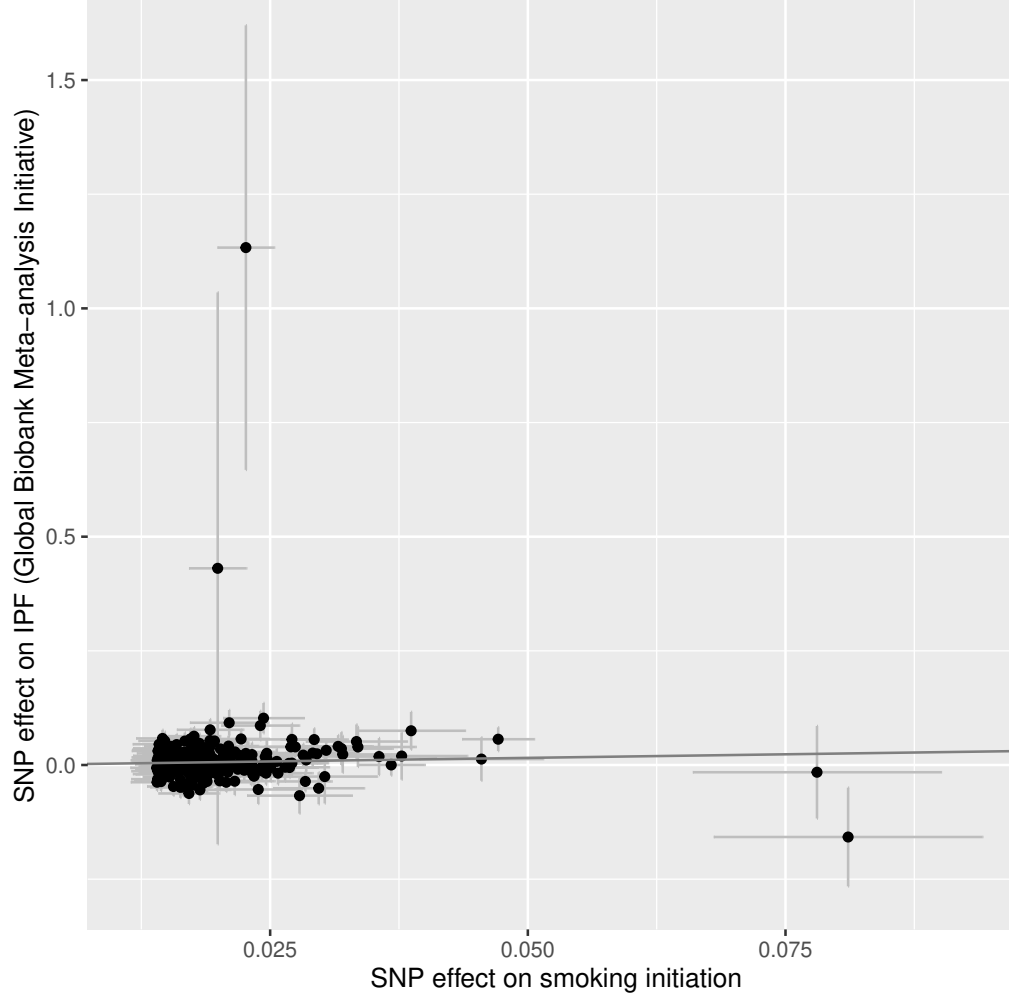

Supplement: thorax-2023-220012supp006_data_supplement.pdf [file thorax-2023-220012supp006_data_supplement.pdf]
